# Supplementary material for: Expression profiling of spinal cord dorsal horn in a rat model of complex regional pain syndrome type-I uncovers potential mechanisms mediating pain and neuroinflammation responses
Source: PubMed Central journal article supplement (PMC7245895; doi:10.1186/s12974-020-01834-0), 2020-05-23

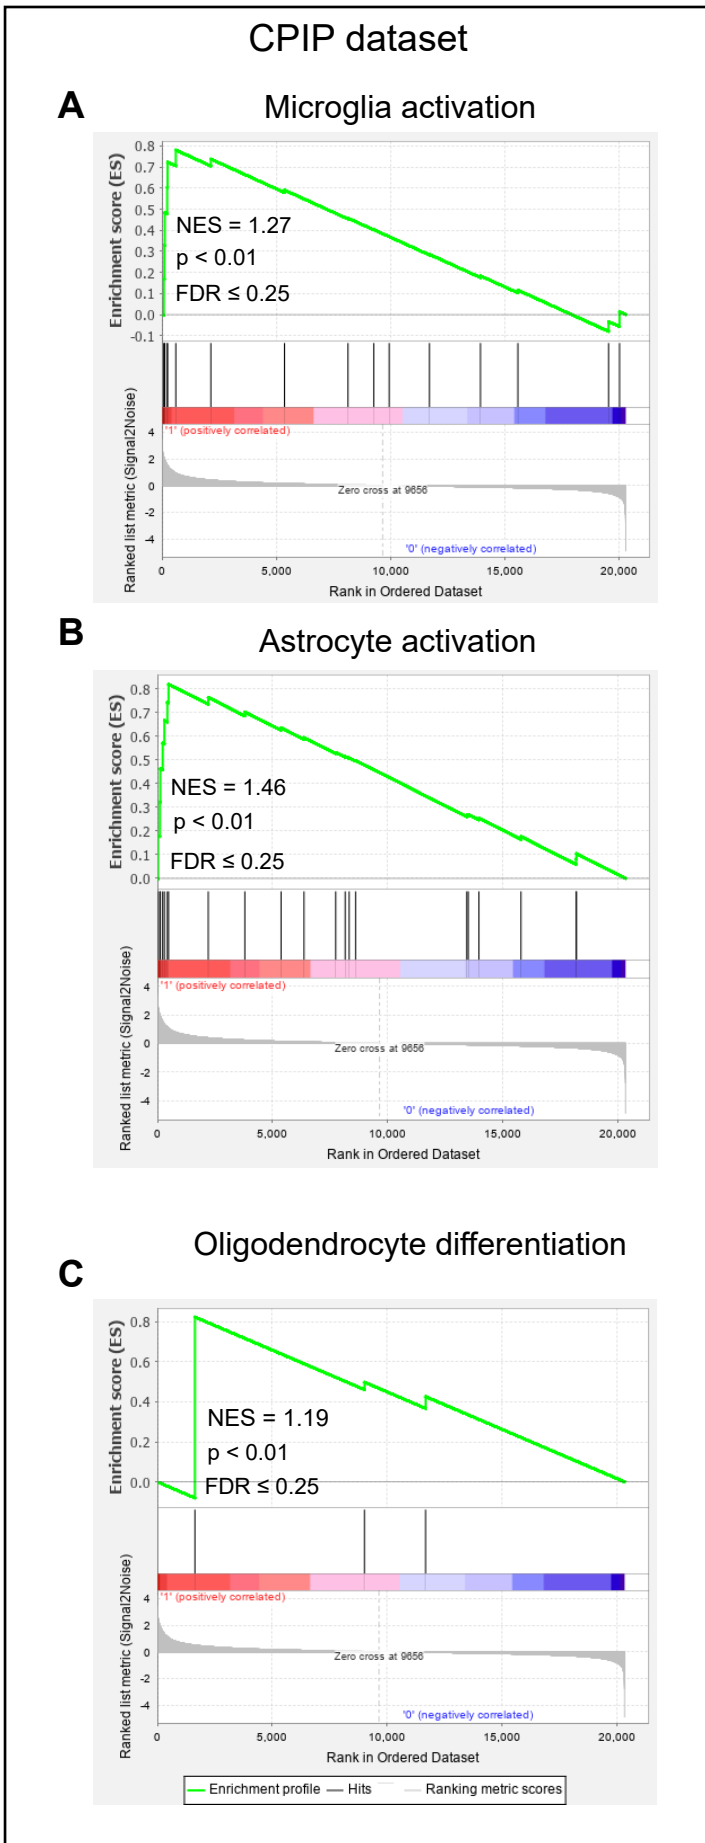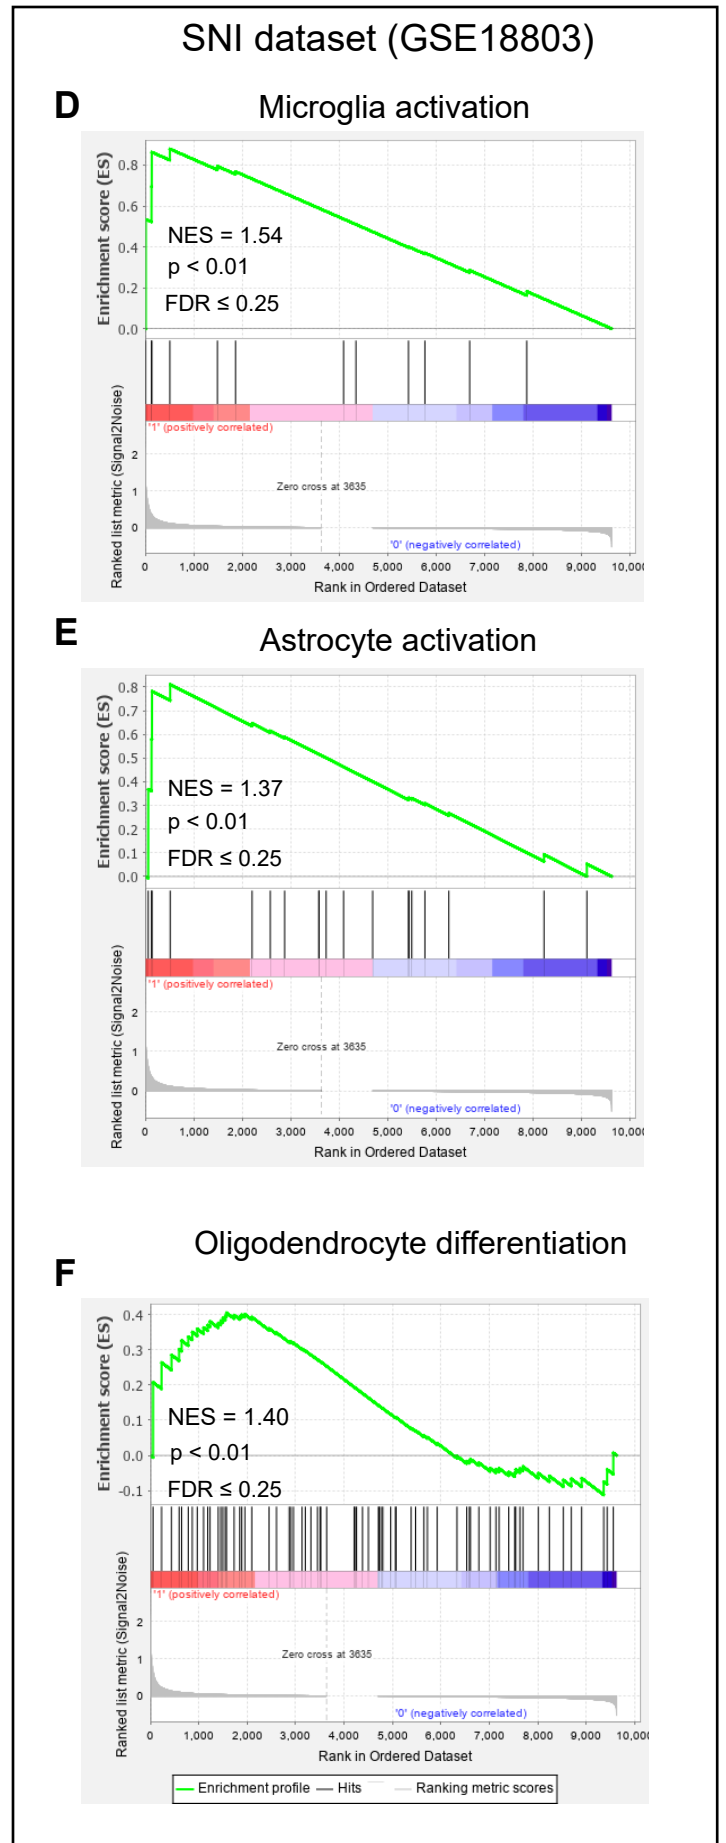

Supplement: 12974_2020_1834_MOESM12_ESM.pdf [file 12974_2020_1834_MOESM12_ESM.pdf]
